# Supplementary material
Source: publisher figshare collection journal article supplement (https://acs.figshare.com/ndownloader/files/4064347)
Supplement: Supplementary file 1 [file 4064347]

# CIF-file generated for Ulbrich uk-115_2rc               R = 0.03
 
#==============================================================================
data_global
#==============================================================================
 
# 0. AUDIT DETAILS
 
_audit_creation_date                 'Dec 20 09:51:48 2011'
_audit_creation_method               'PLATON <TABLE ACC> option'
_audit_update_record
;
;
 
#===============================================================================
 
# 1. SUBMISSION DETAILS
 
_publ_contact_author_name           # Name of author for correspondence
;
;
_publ_contact_author_address        # address of author for correspondence
;
;
 
_publ_contact_author_email           ?
_publ_contact_author_fax             ?
_publ_contact_author_phone           ?
 
_publ_requested_journal              'Acta Crystallographica C'
# Publication choise FI, CI or EI for Inorganic
#                    FM, CM or EM for Metal-organic
#                    FO, CO or EO for Organic
_publ_requested_category             ?
_publ_requested_coeditor_name        ?
 
_publ_contact_letter                # Include date of submission
;
Date of submission ?
 
Please consider this CIF submission for publication as a
Regular Structural Paper in Acta Crystallographica C.
;
 
#===============================================================================
 
# 2. PROCESSING SUMMARY (JOURNAL OFFICE ONLY)
 
_journal_date_recd_electronic        ?
 
_journal_date_to_coeditor            ?
_journal_date_from_coeditor          ?
_journal_date_accepted               ?
 
_journal_date_printers_first         ?
_journal_date_printers_final         ?
_journal_date_proofs_out             ?
_journal_date_proofs_in              ?
 
_journal_coeditor_name               ?
_journal_coeditor_code               ?
_journal_coeditor_notes
;
;
 
_journal_techeditor_code             ?
_journal_techeditor_notes
;
;
 
_journal_coden_ASTM                  ?
_journal_name_full                   ?
_journal_year                        ?
_journal_volume                      ?
_journal_issue                       ?
_journal_page_first                  ?
_journal_page_last                   ?
 
 
_journal_suppl_publ_number           ?
_journal_suppl_publ_pages            ?
 
 
#===============================================================================
 
# 3. TITLE AND AUTHOR LIST
 
_publ_section_title
;
;
_publ_section_title_footnote
;
;
 
# The loop structure below should contain the names and adresses of all
# authors, in the required order of publication. Repeat as necessary.
 
 
loop_
_publ_author_name
_publ_author_footnote
_publ_author_address
'?' # author name
;   # author related footnote
;
;   # Address of this author
;
 
#===============================================================================
 
# 4. TEXT
 
_publ_section_synopsis
;
 ?
;
_publ_section_abstract
;
 ?
;
 
# Insert blank lines between paragraphs
 
_publ_section_comment
;
;
_publ_section_exptl_prep
;
 ?
;
_publ_section_exptl_refinement
;
 ?
;
 
# Insert blank lines between references
 
_publ_section_references
;
  Altomare, A., Burla, M.C., Camalli, M., Cascarano, G.L., Giacovazzo, C.
 Guagliardi, A., Moliterni, A.G.G., Polidori, G., Spagna, R.
 (1999) J. Appl. Cryst. 32, 115-119.

 Cosier, J., Glazer, A.M. (1986). J. Appl. Cryst. 19, 105-107.

 Flack, H.D. (1983). Acta Cryst. A39, 876-881.

 L. J. Farrugia, J. Appl. Cryst (1999), 32, 837. 

 Sheldrick, G.M. SHELXL97 (1997). Program for crystal structure
 refinement. University of G\\"ottingen, Germany.
 
 Spek, A.L. (2003). J. Appl. Cryst. 36, 7-13.
;
_publ_section_acknowledgements
;
;
_publ_section_figure_captions
; View of the title compound with the atom numbering scheme.
Displacement ellipsoids for non-H atoms are drawn at the 50% probability level.
;
 
#===============================================================================
 
data_k258fin
 
#===============================================================================
 
# 5. CHEMICAL DATA
 
_chemical_name_systematic
;
;
_chemical_name_common                ?
_chemical_melting_point              ?
_chemical_formula_moiety
'C13 H9 N O3'
_chemical_formula_structural         ?
_chemical_formula_sum
'C13 H9 N O3'
_chemical_formula_iupac              ?
_chemical_formula_weight                227.21
_chemical_compound_source           'see text'
 
loop_
_atom_type_symbol
_atom_type_description
_atom_type_scat_dispersion_real
_atom_type_scat_dispersion_imag
_atom_type_scat_source
 O   O    0.0492    0.0322
 'International Tables Vol C Tables 4.2.6.8 and 6.1.1.4'
 N   N    0.0311    0.0180
 'International Tables Vol C Tables 4.2.6.8 and 6.1.1.4'
 H   H    0.0000    0.0000
 'International Tables Vol C Tables 4.2.6.8 and 6.1.1.4'
 C   C    0.0181    0.0091
 'International Tables Vol C Tables 4.2.6.8 and 6.1.1.4'
 
#===============================================================================
 
# 6. CRYSTAL DATA
 
_symmetry_cell_setting               Orthorhombic
_symmetry_space_group_name_Hall      'P 2ac 2ab'
_symmetry_space_group_name_H-M       'P 21 21 21'
_symmetry_Int_Tables_number                 19
 
loop_
_symmetry_equiv_pos_site_id
_symmetry_equiv_pos_as_xyz
   1 x,y,z
   2 1/2-x,-y,1/2+z
   3 1/2+x,1/2-y,-z
   4 -x,1/2+y,1/2-z
 
_cell_length_a                           8.3790(1)
_cell_length_b                           9.7970(1)
_cell_length_c                          12.8620(2)
_cell_angle_alpha                               90
_cell_angle_beta                                90
_cell_angle_gamma                               90
_cell_volume                            1055.83(2)
_cell_formula_units_Z                    4
_cell_measurement_temperature          123(1)
_cell_measurement_reflns_used   6993
_cell_measurement_theta_min     3.4334
_cell_measurement_theta_max     74.7596
_cell_special_details
;
;
 
_exptl_crystal_description          'rod'
_exptl_crystal_colour               'colourless'
 
_exptl_crystal_size_max              0.28
_exptl_crystal_size_mid              0.10
_exptl_crystal_size_min              0.09
_exptl_crystal_size_rad              ?
_exptl_crystal_density_meas          ?
_exptl_crystal_density_diffrn            1.429
_exptl_crystal_density_method       'Not Measured'
_exptl_crystal_F_000                       472
_exptl_absorpt_coefficient_mu            0.856
_exptl_crystal_density_meas_temp     ?
 
_exptl_absorpt_correction_T_min                   0.81056
_exptl_absorpt_correction_T_max                   1.00000
_exptl_absorpt_correction_type            'multi-scan'
_exptl_absorpt_process_details
;
CrysAlisPro, Agilent Technologies,
Version 1.171.35.19 (release 27-10-2011 CrysAlis171 .NET)
(compiled Oct 27 2011,15:02:11)
Empirical absorption correction using spherical harmonics,
 implemented in SCALE3 ABSPACK scaling algorithm.
;
 
#===============================================================================
 
# 7. EXPERIMENTAL DATA
 
_exptl_special_details
;
;
_diffrn_ambient_temperature            123(1)
_diffrn_radiation_wavelength           1.54178
_diffrn_radiation_probe              'x-ray'
_diffrn_radiation_type               'CuK\a'
_diffrn_radiation_source             'SuperNova (Cu) X-ray Source'
_diffrn_radiation_monochromator      'mirror'
_diffrn_measurement_device_type      'SuperNova,Single source at offset,Atlas'
_diffrn_measurement_method           '\w scans'
_diffrn_detector_area_resol_mean     10.3546
 
# number of measured reflections (redundant set)
_diffrn_reflns_number                 9890
_diffrn_reflns_av_R_equivalents       0.0282
_diffrn_reflns_av_sigmaI/netI         0.0175
_diffrn_reflns_limit_h_min              -9
_diffrn_reflns_limit_h_max              10
_diffrn_reflns_limit_k_min             -12
_diffrn_reflns_limit_k_max              12
_diffrn_reflns_limit_l_min             -16
_diffrn_reflns_limit_l_max              15
_diffrn_reflns_theta_min              5.68
_diffrn_reflns_theta_max             74.93
_diffrn_reflns_theta_full            74.93
_diffrn_measured_fraction_theta_max  0.999
_diffrn_measured_fraction_theta_full 0.999
_diffrn_reflns_reduction_process
;
;
 
# number of unique reflections
_reflns_number_total                    2156
# number of observed reflections (> n sig(I))
_reflns_number_gt                       2121
_reflns_threshold_expression         >2\s(i)
 
_computing_data_collection
;
CrysAlisPro, Agilent Technologies,
Version 1.171.35.19 (release 27-10-2011 CrysAlis171 .NET)
(compiled Oct 27 2011,15:02:11)
;
_computing_cell_refinement
;
CrysAlisPro, Agilent Technologies,
Version 1.171.35.19 (release 27-10-2011 CrysAlis171 .NET)
(compiled Oct 27 2011,15:02:11)
;
_computing_data_reduction
;
CrysAlisPro, Agilent Technologies,
Version 1.171.35.19 (release 27-10-2011 CrysAlis171 .NET)
(compiled Oct 27 2011,15:02:11)
;
_computing_structure_solution        'SIR-97 (Altomare, 1999)'
_computing_structure_refinement      'SHELXL-97 (Sheldrick, 1997)'
_computing_molecular_graphics        'SXGRAPH (Farrugia, 1999)'
_computing_publication_material      'PLATON (Spek, 2003)'

#===============================================================================
 
# 8. REFINEMENT DATA
 
_refine_special_details
;
 Refinement on F^2^ for ALL reflections except those
 flagged by the user for potential systematic errors.
 Weighted R-factors wR and all goodnesses of fit S
 are based on F^2^, conventional R-factors R are based
 on F, with F set to zero for negative F^2^. The
 observed criterion of F^2^ > 2sigma(F^2^) is used only
 for calculating -R-factor-obs etc. and is not
 relevant to the choice of reflections for refinement.
 R-factors based on F^2^ are statistically about twice
 as large as those based on F, and R-factors based on
 ALL data will be even larger.
;
_refine_ls_structure_factor_coef     Fsqd
_refine_ls_matrix_type               full
_refine_ls_weighting_scheme          'calc'
_refine_ls_weighting_details
'calc w=1/[\s^2^(Fo^2^)+(0.0561P)^2^+0.1594P] where P=(Fo^2^+2Fc^2^)/3'
_atom_sites_solution_primary        'direct'
_atom_sites_solution_secondary      'difmap'
_atom_sites_solution_hydrogens      'geom'
 
 
_refine_ls_hydrogen_treatment       'refall'
 
_refine_ls_extinction_method         'none'
_refine_ls_abs_structure_details
 'Flack H.D. (1983), Acta Cryst. A39, 876-881'
_refine_ls_abs_structure_Flack             -0.09(19)
 
_chemical_absolute_configuration     ad
 
_refine_ls_number_reflns                  2156
_refine_ls_number_parameters               190
_refine_ls_number_restraints                 0
_refine_ls_number_constraints        ?
_refine_ls_R_factor_all                 0.0325
_refine_ls_R_factor_gt                  0.0320
_refine_ls_wR_factor_ref                0.0837
_refine_ls_wR_factor_gt                 0.0829
_refine_ls_goodness_of_fit_ref           1.051
_refine_ls_restrained_S_all              1.051
_refine_ls_shift/su_max                  0.000
_refine_ls_shift/su_mean                 0.000
_refine_diff_density_max                 0.136
_refine_diff_density_min                -0.217
_refine_diff_density_rms                 0.043
 
#===============================================================================
 
# 9. ATOMIC COORDINATES AND DISPLACEMENT PARAMETERS
 
loop_
_atom_site_label
_atom_site_type_symbol
_atom_site_thermal_displace_type
_atom_site_fract_x
_atom_site_fract_y
_atom_site_fract_z
_atom_site_occupancy
_atom_site_U_iso_or_equiv
_atom_site_calc_flag
_atom_site_refinement_flags
O1 O Uani 0.83368(11) 0.22274(10) 0.74735(7) 1.000 0.0218(3) . .
O2 O Uani 0.57253(13) 0.22212(11) 0.43461(8) 1.000 0.0288(3) . .
O3 O Uani 0.59700(16) 0.53487(14) 0.87594(9) 1.000 0.0442(4) . .
N1 N Uani 0.68988(14) 0.25588(11) 0.59600(8) 1.000 0.0200(3) . .
C1 C Uani 0.78944(14) 0.18298(13) 0.66242(10) 1.000 0.0179(3) . .
C2 C Uani 0.82253(15) 0.05083(13) 0.61013(10) 1.000 0.0183(3) . .
C3 C Uani 0.91451(16) -0.05928(14) 0.64106(10) 1.000 0.0221(3) . .
C4 C Uani 0.92309(17) -0.17000(15) 0.57290(12) 1.000 0.0257(4) . .
C5 C Uani 0.84041(18) -0.17041(15) 0.47886(11) 1.000 0.0259(4) . .
C6 C Uani 0.74701(16) -0.05913(14) 0.44889(10) 1.000 0.0224(4) . .
C7 C Uani 0.74131(15) 0.05072(14) 0.51608(10) 1.000 0.0197(3) . .
C8 C Uani 0.65568(15) 0.18243(14) 0.50529(10) 1.000 0.0198(3) . .
C9 C Uani 0.62390(17) 0.39063(14) 0.61870(10) 1.000 0.0227(3) . .
C10 C Uani 0.53440(18) 0.39819(16) 0.72314(11) 1.000 0.0279(4) . .
C11 C Uani 0.62417(18) 0.50474(15) 0.78589(11) 1.000 0.0270(4) . .
C12 C Uani 0.74780(19) 0.56392(15) 0.71889(12) 1.000 0.0280(4) . .
C13 C Uani 0.7516(2) 0.49889(15) 0.62854(12) 1.000 0.0274(4) . .
H1 H Uiso 0.971(2) -0.0600(17) 0.7086(13) 1.000 0.021(4) . .
H2 H Uiso 0.987(2) -0.2507(18) 0.5946(13) 1.000 0.026(4) . .
H3 H Uiso 0.843(2) -0.2485(19) 0.4342(14) 1.000 0.032(5) . .
H4 H Uiso 0.685(2) -0.0574(18) 0.3806(13) 1.000 0.023(4) . .
H5 H Uiso 0.558(2) 0.4095(18) 0.5599(12) 1.000 0.021(4) . .
H6 H Uiso 0.534(2) 0.3122(19) 0.7605(15) 1.000 0.029(4) . .
H7 H Uiso 0.423(3) 0.427(2) 0.7114(16) 1.000 0.043(5) . .
H8 H Uiso 0.815(2) 0.636(2) 0.7410(14) 1.000 0.038(5) . .
H9 H Uiso 0.822(3) 0.517(2) 0.5707(16) 1.000 0.037(5) . .
 
loop_
_atom_site_aniso_label
_atom_site_aniso_U_11
_atom_site_aniso_U_22
_atom_site_aniso_U_33
_atom_site_aniso_U_23
_atom_site_aniso_U_13
_atom_site_aniso_U_12
O1 0.0250(5) 0.0233(4) 0.0171(4) 0.0003(4) -0.0020(4) -0.0018(4)
O2 0.0307(5) 0.0317(5) 0.0239(5) 0.0008(4) -0.0104(4) 0.0050(4)
O3 0.0457(7) 0.0566(8) 0.0302(6) -0.0133(6) 0.0079(5) 0.0004(6)
N1 0.0204(5) 0.0201(5) 0.0195(5) 0.0000(4) -0.0018(4) 0.0024(4)
C1 0.0160(6) 0.0190(6) 0.0188(5) 0.0026(5) 0.0011(5) -0.0025(4)
C2 0.0159(6) 0.0191(6) 0.0200(5) 0.0009(5) -0.0006(5) -0.0027(5)
C3 0.0196(6) 0.0217(6) 0.0251(6) 0.0042(5) -0.0024(5) -0.0009(5)
C4 0.0243(7) 0.0210(6) 0.0319(7) 0.0023(6) -0.0005(6) 0.0010(6)
C5 0.0273(7) 0.0214(6) 0.0289(7) -0.0038(6) 0.0018(6) -0.0015(6)
C6 0.0215(6) 0.0245(7) 0.0213(6) -0.0019(5) -0.0001(5) -0.0040(6)
C7 0.0175(6) 0.0213(6) 0.0203(6) 0.0005(5) -0.0002(5) -0.0032(5)
C8 0.0180(6) 0.0222(6) 0.0192(6) 0.0013(5) -0.0008(5) -0.0013(5)
C9 0.0245(6) 0.0213(6) 0.0222(6) 0.0010(5) -0.0016(6) 0.0048(5)
C10 0.0235(7) 0.0321(8) 0.0281(7) 0.0004(6) 0.0032(6) 0.0045(6)
C11 0.0275(7) 0.0276(7) 0.0259(7) -0.0015(5) -0.0005(6) 0.0080(6)
C12 0.0319(7) 0.0202(6) 0.0319(7) -0.0004(6) -0.0009(6) 0.0025(6)
C13 0.0337(8) 0.0205(6) 0.0279(7) 0.0038(5) 0.0037(6) 0.0025(6)
 

 
_geom_special_details
;
 Bond distances, angles etc. have been calculated using the
 rounded fractional coordinates. All su's are estimated
 from the variances of the (full) variance-covariance matrix.
 The cell esds are taken into account in the estimation of
 distances, angles and torsion angles
;
 
loop_
_geom_bond_atom_site_label_1
_geom_bond_atom_site_label_2
_geom_bond_distance
_geom_bond_site_symmetry_1
_geom_bond_site_symmetry_2
_geom_bond_publ_flag
 O1      C1       1.2175(16)                     .       .                   yes
 O2      C8       1.2096(17)                     .       .                   yes
 O3      C11      1.2167(18)                     .       .                   yes
 N1      C1       1.3913(17)                     .       .                   yes
 N1      C8       1.4004(17)                     .       .                   yes
 N1      C9       1.4607(18)                     .       .                   yes
 C1      C2       1.4851(18)                     .       .                   no
 C2      C3       1.3842(19)                     .       .                   no
 C2      C7       1.3880(18)                     .       .                   no
 C3      C4         1.397(2)                     .       .                   no
 C4      C5         1.394(2)                     .       .                   no
 C5      C6         1.396(2)                     .       .                   no
 C6      C7       1.3811(19)                     .       .                   no
 C7      C8       1.4829(19)                     .       .                   no
 C9      C10        1.540(2)                     .       .                   no
 C9      C13        1.512(2)                     .       .                   no
 C10     C11        1.519(2)                     .       .                   no
 C11     C12        1.467(2)                     .       .                   no
 C12     C13        1.326(2)                     .       .                   no
 C3      H1        0.989(17)                     .       .                   no
 C4      H2        0.995(17)                     .       .                   no
 C5      H3        0.957(18)                     .       .                   no
 C6      H4        1.021(17)                     .       .                   no
 C9      H5        0.955(16)                     .       .                   no
 C10     H6        0.970(19)                     .       .                   no
 C10     H7          0.99(2)                     .       .                   no
 C12     H8        0.947(19)                     .       .                   no
 C13     H9          0.97(2)                     .       .                   no
 
loop_
_geom_angle_atom_site_label_1
_geom_angle_atom_site_label_2
_geom_angle_atom_site_label_3
_geom_angle
_geom_angle_site_symmetry_1
_geom_angle_site_symmetry_2
_geom_angle_site_symmetry_3
_geom_angle_publ_flag
 C1      N1      C8       111.75(11)             .       .       .           yes
 C1      N1      C9       124.62(10)             .       .       .           yes
 C8      N1      C9       123.61(11)             .       .       .           yes
 O1      C1      N1       124.70(12)             .       .       .           yes
 O1      C1      C2       128.93(12)             .       .       .           yes
 N1      C1      C2       106.34(10)             .       .       .           yes
 C1      C2      C3       130.79(12)             .       .       .           no
 C1      C2      C7       107.69(11)             .       .       .           no
 C3      C2      C7       121.53(12)             .       .       .           no
 C2      C3      C4       116.97(12)             .       .       .           no
 C3      C4      C5       121.42(13)             .       .       .           no
 C4      C5      C6       121.06(13)             .       .       .           no
 C5      C6      C7       117.07(12)             .       .       .           no
 C2      C7      C6       121.94(12)             .       .       .           no
 C2      C7      C8       108.55(11)             .       .       .           no
 C6      C7      C8       129.51(12)             .       .       .           no
 O2      C8      N1       125.37(13)             .       .       .           yes
 O2      C8      C7       128.96(13)             .       .       .           yes
 N1      C8      C7       105.67(11)             .       .       .           yes
 N1      C9      C10      113.71(11)             .       .       .           yes
 N1      C9      C13      112.51(12)             .       .       .           yes
 C10     C9      C13      103.76(11)             .       .       .           no
 C9      C10     C11      104.80(12)             .       .       .           no
 O3      C11     C10      125.44(14)             .       .       .           yes
 O3      C11     C12      126.55(14)             .       .       .           yes
 C10     C11     C12      108.01(12)             .       .       .           no
 C11     C12     C13      110.00(14)             .       .       .           no
 C9      C13     C12      113.17(14)             .       .       .           no
 C2      C3      H1        121.6(10)             .       .       .           no
 C4      C3      H1        121.4(10)             .       .       .           no
 C3      C4      H2        118.0(10)             .       .       .           no
 C5      C4      H2        120.6(10)             .       .       .           no
 C4      C5      H3        120.8(11)             .       .       .           no
 C6      C5      H3        118.1(11)             .       .       .           no
 C5      C6      H4        122.4(10)             .       .       .           no
 C7      C6      H4        120.5(10)             .       .       .           no
 N1      C9      H5        103.6(10)             .       .       .           no
 C10     C9      H5        113.6(10)             .       .       .           no
 C13     C9      H5        109.9(10)             .       .       .           no
 C9      C10     H6        113.1(11)             .       .       .           no
 C9      C10     H7        109.9(12)             .       .       .           no
 C11     C10     H6        109.6(11)             .       .       .           no
 C11     C10     H7        110.7(12)             .       .       .           no
 H6      C10     H7        108.7(16)             .       .       .           no
 C11     C12     H8        122.6(11)             .       .       .           no
 C13     C12     H8        127.4(11)             .       .       .           no
 C9      C13     H9        119.8(13)             .       .       .           no
 C12     C13     H9        127.0(13)             .       .       .           no
 
loop_
_geom_torsion_atom_site_label_1
_geom_torsion_atom_site_label_2
_geom_torsion_atom_site_label_3
_geom_torsion_atom_site_label_4
_geom_torsion
_geom_torsion_site_symmetry_1
_geom_torsion_site_symmetry_2
_geom_torsion_site_symmetry_3
_geom_torsion_site_symmetry_4
_geom_torsion_publ_flag
 C8      N1      C1      O1      -178.14(12)     .       .       .       .   no
 C9      N1      C1      O1          -0.1(2)     .       .       .       .   no
 C8      N1      C1      C2         0.00(14)     .       .       .       .   no
 C9      N1      C1      C2       178.05(11)     .       .       .       .   no
 C9      N1      C8      C7      -177.80(11)     .       .       .       .   no
 C1      N1      C9      C10      -53.58(17)     .       .       .       .   no
 C8      N1      C9      C10      124.25(13)     .       .       .       .   no
 C1      N1      C9      C13       64.01(16)     .       .       .       .   no
 C1      N1      C8      O2      -179.80(13)     .       .       .       .   no
 C9      N1      C8      O2           2.1(2)     .       .       .       .   no
 C1      N1      C8      C7         0.28(14)     .       .       .       .   no
 C8      N1      C9      C13     -118.16(14)     .       .       .       .   no
 O1      C1      C2      C3          -2.3(2)     .       .       .       .   no
 N1      C1      C2      C3       179.70(13)     .       .       .       .   no
 N1      C1      C2      C7        -0.30(14)     .       .       .       .   no
 O1      C1      C2      C7       177.73(13)     .       .       .       .   no
 C1      C2      C3      C4      -179.41(13)     .       .       .       .   no
 C7      C2      C3      C4           0.6(2)     .       .       .       .   no
 C1      C2      C7      C6      -179.58(12)     .       .       .       .   no
 C1      C2      C7      C8         0.47(14)     .       .       .       .   no
 C3      C2      C7      C6           0.4(2)     .       .       .       .   no
 C3      C2      C7      C8      -179.53(12)     .       .       .       .   no
 C2      C3      C4      C5          -1.1(2)     .       .       .       .   no
 C3      C4      C5      C6           0.7(2)     .       .       .       .   no
 C4      C5      C6      C7           0.4(2)     .       .       .       .   no
 C5      C6      C7      C8       179.05(13)     .       .       .       .   no
 C5      C6      C7      C2          -0.9(2)     .       .       .       .   no
 C2      C7      C8      O2       179.62(14)     .       .       .       .   no
 C6      C7      C8      O2          -0.3(2)     .       .       .       .   no
 C6      C7      C8      N1       179.58(13)     .       .       .       .   no
 C2      C7      C8      N1        -0.47(14)     .       .       .       .   no
 N1      C9      C10     C11      119.60(13)     .       .       .       .   no
 C13     C9      C10     C11       -2.95(15)     .       .       .       .   no
 N1      C9      C13     C12     -123.44(14)     .       .       .       .   no
 C10     C9      C13     C12       -0.10(18)     .       .       .       .   no
 C9      C10     C11     O3      -175.17(15)     .       .       .       .   no
 C9      C10     C11     C12        4.89(16)     .       .       .       .   no
 O3      C11     C12     C13      174.86(16)     .       .       .       .   no
 C10     C11     C12     C13       -5.20(18)     .       .       .       .   no
 C11     C12     C13     C9         3.31(19)     .       .       .       .   no
 
loop_
_geom_contact_atom_site_label_1
_geom_contact_atom_site_label_2
_geom_contact_distance
_geom_contact_site_symmetry_1
_geom_contact_site_symmetry_2
_geom_contact_publ_flag
 O1      C10      3.0561(18)                     .       .                   no
 O1      C11      3.3106(18)                     .       .                   no
 O1      C13      3.1824(18)                     .       .                   no
 O1      C4       3.2562(18)                     .     4_756                 no
 O1      C5       3.3552(17)                     .     2_655                 no
 O1      C6       3.1218(16)                     .     2_655                 no
 O1      C3       3.3275(16)                     .     4_756                 no
 O1      O2       3.1264(14)                     .     3_556                 no
 O2      O1       3.1264(14)                     .     3_456                 no
 O2      N1       3.2375(16)                     .     3_456                 no
 O2      C2       3.1092(17)                     .     3_456                 no
 O2      C1       2.8370(16)                     .     3_456                 no
 O3      C8       2.9843(18)                     .     4_656                 no
 O3      N1       3.2552(18)                     .     4_656                 no
 O3      C7       3.1605(18)                     .     4_656                 no
 O1      H1        2.744(17)                     .     4_756                 no
 O1      H4        2.363(17)                     .     2_655                 no
 O1      H6        2.665(17)                     .       .                   no
 O1      H3        2.834(18)                     .     2_655                 no
 O1      H2        2.541(17)                     .     4_756                 no
 O2      H5        2.446(17)                     .       .                   no
 O3      H9          2.65(2)                     .     2_665                 no
 N1      O2       3.2375(16)                     .     3_556                 no
 N1      O3       3.2552(18)                     .     4_646                 no
 C1      O2       2.8370(16)                     .     3_556                 no
 C2      O2       3.1092(17)                     .     3_556                 no
 C3      C12        3.565(2)                     .     4_746                 no
 C3      O1       3.3275(16)                     .     4_746                 no
 C4      C12        3.533(2)                     .     1_545                 no
 C4      O1       3.2562(18)                     .     4_746                 no
 C5      O1       3.3552(17)                     .     2_654                 no
 C6      O1       3.1218(16)                     .     2_654                 no
 C7      O3       3.1605(18)                     .     4_646                 no
 C8      O3       2.9843(18)                     .     4_646                 no
 C10     O1       3.0561(18)                     .       .                   no
 C11     O1       3.3106(18)                     .       .                   no
 C12     C3         3.565(2)                     .     4_756                 no
 C12     C4         3.533(2)                     .     1_565                 no
 C13     O1       3.1824(18)                     .       .                   no
 C1      H4        3.072(17)                     .     2_655                 no
 C1      H6        2.788(18)                     .       .                   no
 C2      H5        2.971(16)                     .     3_556                 no
 C4      H8        3.018(19)                     .     1_545                 no
 C6      H7          2.85(2)                     .     3_556                 no
 C6      H2        2.921(17)                     .     3_446                 no
 C6      H5        2.992(17)                     .     3_556                 no
 C7      H5        2.855(17)                     .     3_556                 no
 C12     H1        2.810(17)                     .     4_756                 no
 H1      O1        2.744(17)                     .     4_746                 no
 H1      C12       2.810(17)                     .     4_746                 no
 H2      C6        2.921(17)                     .     3_546                 no
 H2      H4          2.53(2)                     .     3_546                 no
 H2      O1        2.541(17)                     .     4_746                 no
 H3      O1        2.834(18)                     .     2_654                 no
 H3      H6          2.54(3)                     .     2_654                 no
 H4      O1        2.363(17)                     .     2_654                 no
 H4      C1        3.072(17)                     .     2_654                 no
 H4      H2          2.53(2)                     .     3_446                 no
 H5      O2        2.446(17)                     .       .                   no
 H5      C2        2.971(16)                     .     3_456                 no
 H5      C6        2.992(17)                     .     3_456                 no
 H5      C7        2.855(17)                     .     3_456                 no
 H6      O1        2.665(17)                     .       .                   no
 H6      C1        2.788(18)                     .       .                   no
 H6      H3          2.54(3)                     .     2_655                 no
 H7      C6          2.85(2)                     .     3_456                 no
 H8      C4        3.018(19)                     .     1_565                 no
 H9      O3          2.65(2)                     .     2_664                 no
 
loop_
_geom_hbond_atom_site_label_D
_geom_hbond_atom_site_label_H
_geom_hbond_atom_site_label_A
_geom_hbond_distance_DH
_geom_hbond_distance_HA
_geom_hbond_distance_DA
_geom_hbond_angle_DHA
_geom_hbond_site_symmetry_A
_geom_hbond_publ_flag

C4      H2      O1       0.995(17)  2.541(17) 3.2562(18)  128.6(13)   4_746 yes
C6      H4      O1       1.021(17)  2.363(17) 3.1218(16)  130.3(13)   2_654 yes
C9      H5      O2       0.955(16)  2.446(17) 2.9184(17)  110.4(12)     .   yes
 

 
 
#===END
